# Supplementary material
Source: ML conference proceedings conference paper supplement (https://openreview.net/forum?id=4CDnIACCQG)
Supplement: supplementary_material [file storm_dataset.xlsx]

## Sheet: Sheet1
	datetime	Brest	Marseille
0	2018-01-01	4640	504
1	2018-01-01 01:00:00	5852	440
2	2018-01-01 02:00:00	6780	458
3	2018-01-01 03:00:00	7129	541
4	2018-01-01 04:00:00	6703	572
5	2018-01-01 05:00:00	5712	670
6	2018-01-01 06:00:00	4514	694
7	2018-01-01 07:00:00	3394	712
8	2018-01-01 08:00:00	2411	681
9	2018-01-01 09:00:00	1485	657
10	2018-01-01 10:00:00	1460	631
11	2018-01-01 11:00:00	2463	566
12	2018-01-01 12:00:00	3924	513
13	2018-01-01 13:00:00	5296	427
14	2018-01-01 14:00:00	6352	409
15	2018-01-01 15:00:00	7093	435
16	2018-01-01 16:00:00	7048	465
17	2018-01-01 17:00:00	6105	534
18	2018-01-01 18:00:00	4855	549
19	2018-01-01 19:00:00	3505	582
20	2018-01-01 20:00:00	2253	557
21	2018-01-01 21:00:00	1259	544
22	2018-01-01 22:00:00	1056	518
23	2018-01-01 23:00:00	1919	523
24	2018-01-02	3272	542
25	2018-01-02 01:00:00	4782	521
26	2018-01-02 02:00:00	6181	485
27	2018-01-02 03:00:00	7145	491
28	2018-01-02 04:00:00	7407	553
29	2018-01-02 05:00:00	6752	592
30	2018-01-02 06:00:00	5600	563
31	2018-01-02 07:00:00	4237	559
32	2018-01-02 08:00:00	2856	535
33	2018-01-02 09:00:00	1679	504
34	2018-01-02 10:00:00	1139	453
35	2018-01-02 11:00:00	1423	430
36	2018-01-02 12:00:00	2484	380
37	2018-01-02 13:00:00	4092	333
38	2018-01-02 14:00:00	5622	301
39	2018-01-02 15:00:00	6840	317
40	2018-01-02 16:00:00	7520	337
41	2018-01-02 17:00:00	7290	368
42	2018-01-02 18:00:00	6300	425
43	2018-01-02 19:00:00	4971	430
44	2018-01-02 20:00:00	3544	408
45	2018-01-02 21:00:00	2239	382
46	2018-01-02 22:00:00	1352	381
47	2018-01-02 23:00:00	1377	339
48	2018-01-03	2307	283
49	2018-01-03 01:00:00	3744	259
50	2018-01-03 02:00:00	5348	231
51	2018-01-03 03:00:00	6733	251
52	2018-01-03 04:00:00	7579	293
53	2018-01-03 05:00:00	7676	386
54	2018-01-03 06:00:00	6823	506
55	2018-01-03 07:00:00	5568	572
56	2018-01-03 08:00:00	4008	637
57	2018-01-03 09:00:00	2519	647
58	2018-01-03 10:00:00	1374	669
59	2018-01-03 11:00:00	795	686
60	2018-01-03 12:00:00	1271	566
61	2018-01-03 13:00:00	2579	482
62	2018-01-03 14:00:00	4180	420
63	2018-01-03 15:00:00	5797	344
64	2018-01-03 16:00:00	6996	346
65	2018-01-03 17:00:00	7486	376
66	2018-01-03 18:00:00	7062	422
67	2018-01-03 19:00:00	5978	453
68	2018-01-03 20:00:00	4625	476
69	2018-01-03 21:00:00	3263	440
70	2018-01-03 22:00:00	2023	376
71	2018-01-03 23:00:00	1118	341
72	2018-01-04	1231	295
73	2018-01-04 01:00:00	2393	249
74	2018-01-04 02:00:00	4004	253
75	2018-01-04 03:00:00	5609	250
76	2018-01-04 04:00:00	6899	278
77	2018-01-04 05:00:00	7662	304
78	2018-01-04 06:00:00	7624	380
79	2018-01-04 07:00:00	6714	542
80	2018-01-04 08:00:00	5339	666
81	2018-01-04 09:00:00	3860	677
82	2018-01-04 10:00:00	2470	668
83	2018-01-04 11:00:00	1319	594
84	2018-01-04 12:00:00	865	525
85	2018-01-04 13:00:00	1536	453
86	2018-01-04 14:00:00	2965	409
87	2018-01-04 15:00:00	4570	365
88	2018-01-04 16:00:00	6041	331
89	2018-01-04 17:00:00	7107	322
90	2018-01-04 18:00:00	7456	363
91	2018-01-04 19:00:00	6956	418
92	2018-01-04 20:00:00	5878	470
93	2018-01-04 21:00:00	4475	480
94	2018-01-04 22:00:00	3030	482
95	2018-01-04 23:00:00	1870	436
96	2018-01-05	1245	390
97	2018-01-05 01:00:00	1545	363
98	2018-01-05 02:00:00	2754	332
99	2018-01-05 03:00:00	4377	305
100	2018-01-05 04:00:00	5924	307
101	2018-01-05 05:00:00	7075	323
102	2018-01-05 06:00:00	7642	397
103	2018-01-05 07:00:00	7396	483
104	2018-01-05 08:00:00	6401	573
105	2018-01-05 09:00:00	5030	632
106	2018-01-05 10:00:00	3661	657
107	2018-01-05 11:00:00	2424	642
108	2018-01-05 12:00:00	1482	631
109	2018-01-05 13:00:00	1278	608
110	2018-01-05 14:00:00	2037	568
111	2018-01-05 15:00:00	3407	530
112	2018-01-05 16:00:00	4925	503
113	2018-01-05 17:00:00	6210	486
114	2018-01-05 18:00:00	7068	508
115	2018-01-05 19:00:00	7280	553
116	2018-01-05 20:00:00	6591	607
117	2018-01-05 21:00:00	5398	666
118	2018-01-05 22:00:00	4098	690
119	2018-01-05 23:00:00	2906	683
120	2018-01-06	1913	678
121	2018-01-06 01:00:00	1466	632
122	2018-01-06 02:00:00	1931	602
123	2018-01-06 03:00:00	3150	559
124	2018-01-06 04:00:00	4658	518
125	2018-01-06 05:00:00	5993	517
126	2018-01-06 06:00:00	6908	546
127	2018-01-06 07:00:00	7282	626
128	2018-01-06 08:00:00	6903	685
129	2018-01-06 09:00:00	5889	726
130	2018-01-06 10:00:00	4619	768
131	2018-01-06 11:00:00	3387	767
132	2018-01-06 12:00:00	2292	758
133	2018-01-06 13:00:00	1528	724
134	2018-01-06 14:00:00	1515	699
135	2018-01-06 15:00:00	2351	673
136	2018-01-06 16:00:00	3665	631
137	2018-01-06 17:00:00	5021	606
138	2018-01-06 18:00:00	6081	602
139	2018-01-06 19:00:00	6678	614
140	2018-01-06 20:00:00	6666	663
141	2018-01-06 21:00:00	5965	687
142	2018-01-06 22:00:00	4872	703
143	2018-01-06 23:00:00	3729	702
144	2018-01-07	2743	691
145	2018-01-07 01:00:00	1950	680
146	2018-01-07 02:00:00	1667	664
147	2018-01-07 03:00:00	2248	631
148	2018-01-07 04:00:00	3396	615
149	2018-01-07 05:00:00	4680	596
150	2018-01-07 06:00:00	5784	608
151	2018-01-07 07:00:00	6460	649
152	2018-01-07 08:00:00	6622	687
153	2018-01-07 09:00:00	6157	748
154	2018-01-07 10:00:00	5232	786
155	2018-01-07 11:00:00	4134	816
156	2018-01-07 12:00:00	3091	819
157	2018-01-07 13:00:00	2216	806
158	2018-01-07 14:00:00	1666	784
159	2018-01-07 15:00:00	1823	764
160	2018-01-07 16:00:00	2635	737
161	2018-01-07 17:00:00	3772	710
162	2018-01-07 18:00:00	4934	685
163	2018-01-07 19:00:00	5842	679
164	2018-01-07 20:00:00	6296	681
165	2018-01-07 21:00:00	6159	689
166	2018-01-07 22:00:00	5544	721
167	2018-01-07 23:00:00	4673	737
168	2018-01-08	3733	734
169	2018-01-08 01:00:00	2937	722
170	2018-01-08 02:00:00	2352	713
171	2018-01-08 03:00:00	2202	701
172	2018-01-08 04:00:00	2744	686
173	2018-01-08 05:00:00	3739	676
174	2018-01-08 06:00:00	4823	683
175	2018-01-08 07:00:00	5731	678
176	2018-01-08 08:00:00	6277	693
177	2018-01-08 09:00:00	6346	724
178	2018-01-08 10:00:00	5874	773
179	2018-01-08 11:00:00	5047	806
180	2018-01-08 12:00:00	4105	827
181	2018-01-08 13:00:00	3281	826
182	2018-01-08 14:00:00	2626	813
183	2018-01-08 15:00:00	2247	790
184	2018-01-08 16:00:00	2416	780
185	2018-01-08 17:00:00	3147	766
186	2018-01-08 18:00:00	4155	726
187	2018-01-08 19:00:00	5048	700
188	2018-01-08 20:00:00	5661	689
189	2018-01-08 21:00:00	5999	691
190	2018-01-08 22:00:00	5869	704
191	2018-01-08 23:00:00	5282	724
192	2018-01-09	4527	726
193	2018-01-09 01:00:00	3782	713
194	2018-01-09 02:00:00	3159	703
195	2018-01-09 03:00:00	2666	692
196	2018-01-09 04:00:00	2567	680
197	2018-01-09 05:00:00	3137	663
198	2018-01-09 06:00:00	4048	636
199	2018-01-09 07:00:00	4934	632
200	2018-01-09 08:00:00	5609	620
201	2018-01-09 09:00:00	6006	631
202	2018-01-09 10:00:00	6079	675
203	2018-01-09 11:00:00	5684	705
204	2018-01-09 12:00:00	4973	715
205	2018-01-09 13:00:00	4254	733
206	2018-01-09 14:00:00	3657	730
207	2018-01-09 15:00:00	3114	737
208	2018-01-09 16:00:00	2777	749
209	2018-01-09 17:00:00	2946	743
210	2018-01-09 18:00:00	3551	737
211	2018-01-09 19:00:00	4338	710
212	2018-01-09 20:00:00	5021	685
213	2018-01-09 21:00:00	5535	673
214	2018-01-09 22:00:00	5830	691
215	2018-01-09 23:00:00	5735	696
216	2018-01-10	5215	707
217	2018-01-10 01:00:00	4554	728
218	2018-01-10 02:00:00	3982	746
219	2018-01-10 03:00:00	3423	750
220	2018-01-10 04:00:00	2910	784
221	2018-01-10 05:00:00	2843	773
222	2018-01-10 06:00:00	3327	794
223	2018-01-10 07:00:00	4034	749
224	2018-01-10 08:00:00	4744	732
225	2018-01-10 09:00:00	5343	696
226	2018-01-10 10:00:00	5720	695
227	2018-01-10 11:00:00	5795	689
228	2018-01-10 12:00:00	5454	693
229	2018-01-10 13:00:00	4872	701
230	2018-01-10 14:00:00	4332	702
231	2018-01-10 15:00:00	3813	701
232	2018-01-10 16:00:00	3269	691
233	2018-01-10 17:00:00	2931	679
234	2018-01-10 18:00:00	3070	640
235	2018-01-10 19:00:00	3588	617
236	2018-01-10 20:00:00	4229	586
237	2018-01-10 21:00:00	4864	554
238	2018-01-10 22:00:00	5402	543
239	2018-01-10 23:00:00	5713	545
240	2018-01-11	5616	573
241	2018-01-11 01:00:00	5162	598
242	2018-01-11 02:00:00	4607	617
243	2018-01-11 03:00:00	4021	635
244	2018-01-11 04:00:00	3420	633
245	2018-01-11 05:00:00	2920	627
246	2018-01-11 06:00:00	2770	616
247	2018-01-11 07:00:00	3117	602
248	2018-01-11 08:00:00	3739	591
249	2018-01-11 09:00:00	4391	601
250	2018-01-11 10:00:00	4977	594
251	2018-01-11 11:00:00	5388	593
252	2018-01-11 12:00:00	5502	615
253	2018-01-11 13:00:00	5247	634
254	2018-01-11 14:00:00	4753	658
255	2018-01-11 15:00:00	4204	664
256	2018-01-11 16:00:00	3605	666
257	2018-01-11 17:00:00	3039	646
258	2018-01-11 18:00:00	2729	635
259	2018-01-11 19:00:00	2792	599
260	2018-01-11 20:00:00	3211	564
261	2018-01-11 21:00:00	3867	522
262	2018-01-11 22:00:00	4589	510
263	2018-01-11 23:00:00	5250	496
264	2018-01-12	5602	510
265	2018-01-12 01:00:00	5564	544
266	2018-01-12 02:00:00	5207	561
267	2018-01-12 03:00:00	4617	608
268	2018-01-12 04:00:00	3967	620
269	2018-01-12 05:00:00	3346	624
270	2018-01-12 06:00:00	2901	636
271	2018-01-12 07:00:00	2777	624
272	2018-01-12 08:00:00	3048	610
273	2018-01-12 09:00:00	3621	605
274	2018-01-12 10:00:00	4346	601
275	2018-01-12 11:00:00	5054	606
276	2018-01-12 12:00:00	5557	611
277	2018-01-12 13:00:00	5731	608
278	2018-01-12 14:00:00	5521	614
279	2018-01-12 15:00:00	5000	619
280	2018-01-12 16:00:00	4372	634
281	2018-01-12 17:00:00	3731	630
282	2018-01-12 18:00:00	3129	611
283	2018-01-12 19:00:00	2759	580
284	2018-01-12 20:00:00	2822	538
285	2018-01-12 21:00:00	3302	493
286	2018-01-12 22:00:00	4069	450
287	2018-01-12 23:00:00	4899	442
288	2018-01-13	5592	448
289	2018-01-13 01:00:00	5999	457
290	2018-01-13 02:00:00	5993	492
291	2018-01-13 03:00:00	5567	541
292	2018-01-13 04:00:00	4868	581
293	2018-01-13 05:00:00	4122	595
294	2018-01-13 06:00:00	3446	601
295	2018-01-13 07:00:00	2943	599
296	2018-01-13 08:00:00	2794	575
297	2018-01-13 09:00:00	3106	545
298	2018-01-13 10:00:00	3781	524
299	2018-01-13 11:00:00	4588	516
300	2018-01-13 12:00:00	5343	506
301	2018-01-13 13:00:00	5879	503
302	2018-01-13 14:00:00	6048	527
303	2018-01-13 15:00:00	5767	556
304	2018-01-13 16:00:00	5121	585
305	2018-01-13 17:00:00	4351	598
306	2018-01-13 18:00:00	3597	598
307	2018-01-13 19:00:00	2945	575
308	2018-01-13 20:00:00	2583	540
309	2018-01-13 21:00:00	2724	502
310	2018-01-13 22:00:00	3332	480
311	2018-01-13 23:00:00	4202	466
312	2018-01-14	5102	455
313	2018-01-14 01:00:00	5816	483
314	2018-01-14 02:00:00	6199	519
315	2018-01-14 03:00:00	6089	569
316	2018-01-14 04:00:00	5478	638
317	2018-01-14 05:00:00	4621	675
318	2018-01-14 06:00:00	3744	687
319	2018-01-14 07:00:00	2994	681
320	2018-01-14 08:00:00	2436	674
321	2018-01-14 09:00:00	2334	665
322	2018-01-14 10:00:00	2837	643
323	2018-01-14 11:00:00	3689	622
324	2018-01-14 12:00:00	4609	614
325	2018-01-14 13:00:00	5406	604
326	2018-01-14 14:00:00	5937	613
327	2018-01-14 15:00:00	6055	635
328	2018-01-14 16:00:00	5616	678
329	2018-01-14 17:00:00	4818	694
330	2018-01-14 18:00:00	3947	690
331	2018-01-14 19:00:00	3153	681
332	2018-01-14 20:00:00	2487	654
333	2018-01-14 21:00:00	2174	609
334	2018-01-14 22:00:00	2506	563
335	2018-01-14 23:00:00	3377	528
336	2018-01-15	4456	502
337	2018-01-15 01:00:00	5424	487
338	2018-01-15 02:00:00	6106	501
339	2018-01-15 03:00:00	6440	558
340	2018-01-15 04:00:00	6186	614
341	2018-01-15 05:00:00	5392	664
342	2018-01-15 06:00:00	4447	684
343	2018-01-15 07:00:00	3538	687
344	2018-01-15 08:00:00	2791	676
345	2018-01-15 09:00:00	2303	649
346	2018-01-15 10:00:00	2427	620
347	2018-01-15 11:00:00	3131	593
348	2018-01-15 12:00:00	4056	559
349	2018-01-15 13:00:00	5078	540
350	2018-01-15 14:00:00	5951	526
351	2018-01-15 15:00:00	6383	538
352	2018-01-15 16:00:00	6245	566
353	2018-01-15 17:00:00	5618	606
354	2018-01-15 18:00:00	4761	620
355	2018-01-15 19:00:00	3774	610
356	2018-01-15 20:00:00	2894	570
357	2018-01-15 21:00:00	2295	545
358	2018-01-15 22:00:00	2219	515
359	2018-01-15 23:00:00	2829	489
360	2018-01-16	3819	468
361	2018-01-16 01:00:00	4977	470
362	2018-01-16 02:00:00	5998	472
363	2018-01-16 03:00:00	6606	509
364	2018-01-16 04:00:00	6655	569
365	2018-01-16 05:00:00	6052	643
366	2018-01-16 06:00:00	5091	682
367	2018-01-16 07:00:00	4048	702
368	2018-01-16 08:00:00	3064	717
369	2018-01-16 09:00:00	2318	711
370	2018-01-16 10:00:00	2030	693
371	2018-01-16 11:00:00	2358	663
372	2018-01-16 12:00:00	3279	671
373	2018-01-16 13:00:00	4442	674
374	2018-01-16 14:00:00	5520	618
375	2018-01-16 15:00:00	6333	604
376	2018-01-16 16:00:00	6600	628
377	2018-01-16 17:00:00	6181	670
378	2018-01-16 18:00:00	5325	671
379	2018-01-16 19:00:00	4304	688
380	2018-01-16 20:00:00	3276	673
381	2018-01-16 21:00:00	2437	640
382	2018-01-16 22:00:00	1897	614
383	2018-01-16 23:00:00	2014	569
384	2018-01-17	2907	567
385	2018-01-17 01:00:00	4104	535
386	2018-01-17 02:00:00	5270	528
387	2018-01-17 03:00:00	6174	534
388	2018-01-17 04:00:00	6589	578
389	2018-01-17 05:00:00	6356	591
390	2018-01-17 06:00:00	5517	642
391	2018-01-17 07:00:00	4408	676
392	2018-01-17 08:00:00	3297	681
393	2018-01-17 09:00:00	2337	643
394	2018-01-17 10:00:00	1686	583
395	2018-01-17 11:00:00	1642	531
396	2018-01-17 12:00:00	2357	506
397	2018-01-17 13:00:00	3476	431
398	2018-01-17 14:00:00	4698	406
399	2018-01-17 15:00:00	5767	367
400	2018-01-17 16:00:00	6366	373
401	2018-01-17 17:00:00	6349	383
402	2018-01-17 18:00:00	5772	408
403	2018-01-17 19:00:00	4823	416
404	2018-01-17 20:00:00	3755	392
405	2018-01-17 21:00:00	2759	359
406	2018-01-17 22:00:00	2035	318
407	2018-01-17 23:00:00	1891	268
408	2018-01-18	2439	235
409	2018-01-18 01:00:00	3525	205
410	2018-01-18 02:00:00	4821	198
411	2018-01-18 03:00:00	5980	197
412	2018-01-18 04:00:00	6761	236
413	2018-01-18 05:00:00	6907	295
414	2018-01-18 06:00:00	6378	360
415	2018-01-18 07:00:00	5381	411
416	2018-01-18 08:00:00	4179	465
417	2018-01-18 09:00:00	3043	465
418	2018-01-18 10:00:00	2156	463
419	2018-01-18 11:00:00	1754	432
420	2018-01-18 12:00:00	2085	415
421	2018-01-18 13:00:00	2979	410
422	2018-01-18 14:00:00	4200	394
423	2018-01-18 15:00:00	5475	372
424	2018-01-18 16:00:00	6364	371
425	2018-01-18 17:00:00	6689	397
426	2018-01-18 18:00:00	6352	422
427	2018-01-18 19:00:00	5482	462
428	2018-01-18 20:00:00	4381	463
429	2018-01-18 21:00:00	3221	436
430	2018-01-18 22:00:00	2304	403
431	2018-01-18 23:00:00	1776	370
432	2018-01-19	1903	321
433	2018-01-19 01:00:00	2754	294
434	2018-01-19 02:00:00	3988	276
435	2018-01-19 03:00:00	5292	277
436	2018-01-19 04:00:00	6331	304
437	2018-01-19 05:00:00	6839	349
438	2018-01-19 06:00:00	6673	428
439	2018-01-19 07:00:00	5908	509
440	2018-01-19 08:00:00	4765	558
441	2018-01-19 09:00:00	3508	572
442	2018-01-19 10:00:00	2472	568
443	2018-01-19 11:00:00	1815	525
444	2018-01-19 12:00:00	1678	492
445	2018-01-19 13:00:00	2259	455
446	2018-01-19 14:00:00	3402	424
447	2018-01-19 15:00:00	4732	400
448	2018-01-19 16:00:00	5838	389
449	2018-01-19 17:00:00	6462	404
450	2018-01-19 18:00:00	6521	429
451	2018-01-19 19:00:00	5945	456
452	2018-01-19 20:00:00	4908	466
453	2018-01-19 21:00:00	3740	468
454	2018-01-19 22:00:00	2731	431
455	2018-01-19 23:00:00	2023	403
456	2018-01-20	1764	361
457	2018-01-20 01:00:00	2219	323
458	2018-01-20 02:00:00	3367	291
459	2018-01-20 03:00:00	4814	269
460	2018-01-20 04:00:00	6055	283
461	2018-01-20 05:00:00	6737	317
462	2018-01-20 06:00:00	6886	371
463	2018-01-20 07:00:00	6550	442
464	2018-01-20 08:00:00	5573	503
465	2018-01-20 09:00:00	4291	520
466	2018-01-20 10:00:00	3104	532
467	2018-01-20 11:00:00	2184	535
468	2018-01-20 12:00:00	1701	499
469	2018-01-20 13:00:00	1911	453
470	2018-01-20 14:00:00	2809	433
471	2018-01-20 15:00:00	4060	416
472	2018-01-20 16:00:00	5273	425
473	2018-01-20 17:00:00	6166	465
474	2018-01-20 18:00:00	6531	515
475	2018-01-20 19:00:00	6238	556
476	2018-01-20 20:00:00	5435	596
477	2018-01-20 21:00:00	4332	623
478	2018-01-20 22:00:00	3201	603
479	2018-01-20 23:00:00	2372	594
480	2018-01-21	1844	566
481	2018-01-21 01:00:00	1821	539
482	2018-01-21 02:00:00	2580	511
483	2018-01-21 03:00:00	3799	450
484	2018-01-21 04:00:00	5076	459
485	2018-01-21 05:00:00	6088	439
486	2018-01-21 06:00:00	6607	487
487	2018-01-21 07:00:00	6557	502
488	2018-01-21 08:00:00	5854	541
489	2018-01-21 09:00:00	4796	567
490	2018-01-21 10:00:00	3673	580
491	2018-01-21 11:00:00	2688	543
492	2018-01-21 12:00:00	1955	490
493	2018-01-21 13:00:00	1740	435
494	2018-01-21 14:00:00	2222	382
495	2018-01-21 15:00:00	3278	333
496	2018-01-21 16:00:00	4527	320
497	2018-01-21 17:00:00	5605	302
498	2018-01-21 18:00:00	6276	311
499	2018-01-21 19:00:00	6384	335
500	2018-01-21 20:00:00	5898	379
501	2018-01-21 21:00:00	4965	412
502	2018-01-21 22:00:00	3893	411
503	2018-01-21 23:00:00	2959	407
504	2018-01-22	2289	383
505	2018-01-22 01:00:00	1984	338
506	2018-01-22 02:00:00	2295	324
507	2018-01-22 03:00:00	3204	318
508	2018-01-22 04:00:00	4396	307
509	2018-01-22 05:00:00	5541	277
510	2018-01-22 06:00:00	6386	282
511	2018-01-22 07:00:00	6725	317
512	2018-01-22 08:00:00	6291	374
513	2018-01-22 09:00:00	5294	463
514	2018-01-22 10:00:00	4271	522
515	2018-01-22 11:00:00	3308	517
516	2018-01-22 12:00:00	2425	501
517	2018-01-22 13:00:00	1830	473
518	2018-01-22 14:00:00	1885	436
519	2018-01-22 15:00:00	2653	408
520	2018-01-22 16:00:00	3739	375
521	2018-01-22 17:00:00	4852	344
522	2018-01-22 18:00:00	5735	340
523	2018-01-22 19:00:00	6178	348
524	2018-01-22 20:00:00	6052	418
525	2018-01-22 21:00:00	5385	460
526	2018-01-22 22:00:00	4489	477
527	2018-01-22 23:00:00	3599	470
528	2018-01-23	2847	437
529	2018-01-23 01:00:00	2261	382
530	2018-01-23 02:00:00	2101	332
531	2018-01-23 03:00:00	2640	307
532	2018-01-23 04:00:00	3614	292
533	2018-01-23 05:00:00	4690	285
534	2018-01-23 06:00:00	5651	285
535	2018-01-23 07:00:00	6251	305
536	2018-01-23 08:00:00	6373	355
537	2018-01-23 09:00:00	5922	399
538	2018-01-23 10:00:00	5059	452
539	2018-01-23 11:00:00	4078	481
540	2018-01-23 12:00:00	3185	479
541	2018-01-23 13:00:00	2479	464
542	2018-01-23 14:00:00	2112	435
543	2018-01-23 15:00:00	2337	404
544	2018-01-23 16:00:00	3147	382
545	2018-01-23 17:00:00	4185	359
546	2018-01-23 18:00:00	5127	337
547	2018-01-23 19:00:00	5795	339
548	2018-01-23 20:00:00	6047	351
549	2018-01-23 21:00:00	5782	387
550	2018-01-23 22:00:00	5099	418
551	2018-01-23 23:00:00	4277	436
552	2018-01-24	3502	432
553	2018-01-24 01:00:00	2892	417
554	2018-01-24 02:00:00	2495	396
555	2018-01-24 03:00:00	2512	385
556	2018-01-24 04:00:00	3095	371
557	2018-01-24 05:00:00	4010	356
558	2018-01-24 06:00:00	4960	349
559	2018-01-24 07:00:00	5784	352
560	2018-01-24 08:00:00	6268	376
561	2018-01-24 09:00:00	6228	415
562	2018-01-24 10:00:00	5721	470
563	2018-01-24 11:00:00	4960	501
564	2018-01-24 12:00:00	4099	511
565	2018-01-24 13:00:00	3256	504
566	2018-01-24 14:00:00	2609	488
567	2018-01-24 15:00:00	2388	465
568	2018-01-24 16:00:00	2719	437
569	2018-01-24 17:00:00	3519	407
570	2018-01-24 18:00:00	4451	381
571	2018-01-24 19:00:00	5178	361
572	2018-01-24 20:00:00	5705	360
573	2018-01-24 21:00:00	5932	376
574	2018-01-24 22:00:00	5611	406
575	2018-01-24 23:00:00	4982	428
576	2018-01-25	4291	445
577	2018-01-25 01:00:00	3618	448
578	2018-01-25 02:00:00	3000	445
579	2018-01-25 03:00:00	2588	439
580	2018-01-25 04:00:00	2662	436
581	2018-01-25 05:00:00	3266	425
582	2018-01-25 06:00:00	4096	413
583	2018-01-25 07:00:00	4899	405
584	2018-01-25 08:00:00	5526	408
585	2018-01-25 09:00:00	5932	433
586	2018-01-25 10:00:00	5927	467
587	2018-01-25 11:00:00	5444	510
588	2018-01-25 12:00:00	4729	539
589	2018-01-25 13:00:00	3989	551
590	2018-01-25 14:00:00	3309	544
591	2018-01-25 15:00:00	2724	536
592	2018-01-25 16:00:00	2529	511
593	2018-01-25 17:00:00	2883	485
594	2018-01-25 18:00:00	3559	468
595	2018-01-25 19:00:00	4318	452
596	2018-01-25 20:00:00	4985	440
597	2018-01-25 21:00:00	5461	438
598	2018-01-25 22:00:00	5646	460
599	2018-01-25 23:00:00	5433	490
600	2018-01-26	4900	520
601	2018-01-26 01:00:00	4261	538
602	2018-01-26 02:00:00	3657	556
603	2018-01-26 03:00:00	3042	557
604	2018-01-26 04:00:00	2599	555
605	2018-01-26 05:00:00	2621	549
606	2018-01-26 06:00:00	3075	540
607	2018-01-26 07:00:00	3786	526
608	2018-01-26 08:00:00	4541	528
609	2018-01-26 09:00:00	5142	529
610	2018-01-26 10:00:00	5554	559
611	2018-01-26 11:00:00	5598	595
612	2018-01-26 12:00:00	5203	633
613	2018-01-26 13:00:00	4595	666
614	2018-01-26 14:00:00	3884	671
615	2018-01-26 15:00:00	3205	661
616	2018-01-26 16:00:00	2650	647
617	2018-01-26 17:00:00	2383	607
618	2018-01-26 18:00:00	2571	559
619	2018-01-26 19:00:00	3157	537
620	2018-01-26 20:00:00	3932	507
621	2018-01-26 21:00:00	4639	481
622	2018-01-26 22:00:00	5165	480
623	2018-01-26 23:00:00	5452	480
624	2018-01-27	5409	497
625	2018-01-27 01:00:00	4999	529
626	2018-01-27 02:00:00	4330	557
627	2018-01-27 03:00:00	3644	568
628	2018-01-27 04:00:00	3030	567
629	2018-01-27 05:00:00	2530	547
630	2018-01-27 06:00:00	2397	524
631	2018-01-27 07:00:00	2780	496
632	2018-01-27 08:00:00	3475	471
633	2018-01-27 09:00:00	4244	432
634	2018-01-27 10:00:00	4990	415
635	2018-01-27 11:00:00	5572	403
636	2018-01-27 12:00:00	5752	417
637	2018-01-27 13:00:00	5470	447
638	2018-01-27 14:00:00	4865	480
639	2018-01-27 15:00:00	4131	486
640	2018-01-27 16:00:00	3374	484
641	2018-01-27 17:00:00	2688	463
642	2018-01-27 18:00:00	2281	425
643	2018-01-27 19:00:00	2357	387
644	2018-01-27 20:00:00	2907	352
645	2018-01-27 21:00:00	3705	310
646	2018-01-27 22:00:00	4546	280
647	2018-01-27 23:00:00	5252	276
648	2018-01-28	5716	299
649	2018-01-28 01:00:00	5776	332
650	2018-01-28 02:00:00	5382	385
651	2018-01-28 03:00:00	4652	415
652	2018-01-28 04:00:00	3807	445
653	2018-01-28 05:00:00	3016	444
654	2018-01-28 06:00:00	2340	441
655	2018-01-28 07:00:00	2049	433
656	2018-01-28 08:00:00	2348	408
657	2018-01-28 09:00:00	3044	369
658	2018-01-28 10:00:00	3936	336
659	2018-01-28 11:00:00	4873	319
660	2018-01-28 12:00:00	5625	314
661	2018-01-28 13:00:00	5946	326
662	2018-01-28 14:00:00	5721	360
663	2018-01-28 15:00:00	5102	391
664	2018-01-28 16:00:00	4285	401
665	2018-01-28 17:00:00	3369	402
666	2018-01-28 18:00:00	2486	379
667	2018-01-28 19:00:00	1895	348
668	2018-01-28 20:00:00	1907	304
669	2018-01-28 21:00:00	2515	262
670	2018-01-28 22:00:00	3457	226
671	2018-01-28 23:00:00	4516	200
672	2018-01-29	5433	196
673	2018-01-29 01:00:00	6041	218
674	2018-01-29 02:00:00	6179	261
675	2018-01-29 03:00:00	5731	320
676	2018-01-29 04:00:00	4874	371
677	2018-01-29 05:00:00	3846	397
678	2018-01-29 06:00:00	2862	406
679	2018-01-29 07:00:00	2042	390
680	2018-01-29 08:00:00	1609	364
681	2018-01-29 09:00:00	1866	339
682	2018-01-29 10:00:00	2708	294
683	2018-01-29 11:00:00	3809	265
684	2018-01-29 12:00:00	4947	233
685	2018-01-29 13:00:00	5870	220
686	2018-01-29 14:00:00	6365	240
687	2018-01-29 15:00:00	6205	283
688	2018-01-29 16:00:00	5443	322
689	2018-01-29 17:00:00	4414	346
690	2018-01-29 18:00:00	3315	337
691	2018-01-29 19:00:00	2305	311
692	2018-01-29 20:00:00	1580	266
693	2018-01-29 21:00:00	1494	226
694	2018-01-29 22:00:00	2197	181
695	2018-01-29 23:00:00	3359	150
696	2018-01-30	4625	130
697	2018-01-30 01:00:00	5742	134
698	2018-01-30 02:00:00	6507	174
699	2018-01-30 03:00:00	6652	234
700	2018-01-30 04:00:00	6053	309
701	2018-01-30 05:00:00	5033	368
702	2018-01-30 06:00:00	3876	395
703	2018-01-30 07:00:00	2726	398
704	2018-01-30 08:00:00	1699	381
705	2018-01-30 09:00:00	1171	356
706	2018-01-30 10:00:00	1525	319
707	2018-01-30 11:00:00	2547	277
708	2018-01-30 12:00:00	3869	228
709	2018-01-30 13:00:00	5213	203
710	2018-01-30 14:00:00	6268	195
711	2018-01-30 15:00:00	6831	223
712	2018-01-30 16:00:00	6631	273
713	2018-01-30 17:00:00	5717	316
714	2018-01-30 18:00:00	4490	331
715	2018-01-30 19:00:00	3199	319
716	2018-01-30 20:00:00	2026	281
717	2018-01-30 21:00:00	1232	235
718	2018-01-30 22:00:00	1267	194
719	2018-01-30 23:00:00	2157	148
720	2018-01-31	3529	106
721	2018-01-31 01:00:00	5029	88
722	2018-01-31 02:00:00	6305	97
723	2018-01-31 03:00:00	7111	151
724	2018-01-31 04:00:00	7217	238
725	2018-01-31 05:00:00	6487	315
726	2018-01-31 06:00:00	5267	369
727	2018-01-31 07:00:00	3870	386
728	2018-01-31 08:00:00	2524	382
729	2018-01-31 09:00:00	1415	363
730	2018-01-31 10:00:00	909	337
731	2018-01-31 11:00:00	1391	299
732	2018-01-31 12:00:00	2623	248
733	2018-01-31 13:00:00	4140	200
734	2018-01-31 14:00:00	5627	168
735	2018-01-31 15:00:00	6752	184
736	2018-01-31 16:00:00	7247	228
737	2018-01-31 17:00:00	6872	288
738	2018-01-31 18:00:00	5786	334
739	2018-01-31 19:00:00	4427	343
740	2018-01-31 20:00:00	2972	335
741	2018-01-31 21:00:00	1709	299
742	2018-01-31 22:00:00	967	263
743	2018-01-31 23:00:00	1116	233
744	2018-02-01	2198	196
745	2018-02-01 01:00:00	3769	164
746	2018-02-01 02:00:00	5377	167
747	2018-02-01 03:00:00	6650	200
748	2018-02-01 04:00:00	7372	281
749	2018-02-01 05:00:00	7308	376
750	2018-02-01 06:00:00	6411	458
751	2018-02-01 07:00:00	5036	515
752	2018-02-01 08:00:00	3517	531
753	2018-02-01 09:00:00	2112	525
754	2018-02-01 10:00:00	993	511
755	2018-02-01 11:00:00	580	477
756	2018-02-01 12:00:00	1237	421
757	2018-02-01 13:00:00	2660	357
758	2018-02-01 14:00:00	4369	310
759	2018-02-01 15:00:00	5890	297
760	2018-02-01 16:00:00	6969	317
761	2018-02-01 17:00:00	7352	363
762	2018-02-01 18:00:00	6755	409
763	2018-02-01 19:00:00	5539	446
764	2018-02-01 20:00:00	4081	443
765	2018-02-01 21:00:00	2607	438
766	2018-02-01 22:00:00	1342	423
767	2018-02-01 23:00:00	682	371
768	2018-02-02	1075	324
769	2018-02-02 01:00:00	2347	276
770	2018-02-02 02:00:00	4017	243
771	2018-02-02 03:00:00	5658	251
772	2018-02-02 04:00:00	6906	291
773	2018-02-02 05:00:00	7521	360
774	2018-02-02 06:00:00	7234	438
775	2018-02-02 07:00:00	6135	499
776	2018-02-02 08:00:00	4684	555
777	2018-02-02 09:00:00	3149	586
778	2018-02-02 10:00:00	1770	573
779	2018-02-02 11:00:00	771	534
780	2018-02-02 12:00:00	631	479
781	2018-02-02 13:00:00	1504	414
782	2018-02-02 14:00:00	3004	363
783	2018-02-02 15:00:00	4725	350
784	2018-02-02 16:00:00	6211	342
785	2018-02-02 17:00:00	7134	354
786	2018-02-02 18:00:00	7297	389
787	2018-02-02 19:00:00	6568	448
788	2018-02-02 20:00:00	5261	493
789	2018-02-02 21:00:00	3741	521
790	2018-02-02 22:00:00	2333	507
791	2018-02-02 23:00:00	1228	480
792	2018-02-03	779	452
793	2018-02-03 01:00:00	1398	402
794	2018-02-03 02:00:00	2810	389
795	2018-02-03 03:00:00	4512	377
796	2018-02-03 04:00:00	6109	405
797	2018-02-03 05:00:00	7202	432
798	2018-02-03 06:00:00	7597	490
799	2018-02-03 07:00:00	7118	580
800	2018-02-03 08:00:00	5915	645
801	2018-02-03 09:00:00	4403	669
802	2018-02-03 10:00:00	2895	668
803	2018-02-03 11:00:00	1657	614
804	2018-02-03 12:00:00	880	557
805	2018-02-03 13:00:00	956	487
806	2018-02-03 14:00:00	1977	440
807	2018-02-03 15:00:00	3568	386
808	2018-02-03 16:00:00	5218	355
809	2018-02-03 17:00:00	6458	341
810	2018-02-03 18:00:00	7101	360
811	2018-02-03 19:00:00	6969	387
812	2018-02-03 20:00:00	6066	455
813	2018-02-03 21:00:00	4725	476
814	2018-02-03 22:00:00	3294	467
815	2018-02-03 23:00:00	2065	422
816	2018-02-04	1150	386
817	2018-02-04 01:00:00	961	354
818	2018-02-04 02:00:00	1768	328
819	2018-02-04 03:00:00	3209	315
820	2018-02-04 04:00:00	4865	306
821	2018-02-04 05:00:00	6262	300
822	2018-02-04 06:00:00	7049	331
823	2018-02-04 07:00:00	7125	387
824	2018-02-04 08:00:00	6405	469
825	2018-02-04 09:00:00	5187	534
826	2018-02-04 10:00:00	3810	546
827	2018-02-04 11:00:00	2508	542
828	2018-02-04 12:00:00	1467	506
829	2018-02-04 13:00:00	926	459
830	2018-02-04 14:00:00	1296	421
831	2018-02-04 15:00:00	2427	375
832	2018-02-04 16:00:00	3933	340
833	2018-02-04 17:00:00	5378	314
834	2018-02-04 18:00:00	6368	316
835	2018-02-04 19:00:00	6744	348
836	2018-02-04 20:00:00	6422	391
837	2018-02-04 21:00:00	5444	443
838	2018-02-04 22:00:00	4174	454
839	2018-02-04 23:00:00	2924	446
840	2018-02-05	1957	425
841	2018-02-05 01:00:00	1364	401
842	2018-02-05 02:00:00	1447	378
843	2018-02-05 03:00:00	2351	355
844	2018-02-05 04:00:00	3756	333
845	2018-02-05 05:00:00	5194	335
846	2018-02-05 06:00:00	6265	348
847	2018-02-05 07:00:00	6782	391
848	2018-02-05 08:00:00	6659	472
849	2018-02-05 09:00:00	5880	532
850	2018-02-05 10:00:00	4714	574
851	2018-02-05 11:00:00	3474	586
852	2018-02-05 12:00:00	2441	575
853	2018-02-05 13:00:00	1668	558
854	2018-02-05 14:00:00	1400	524
855	2018-02-05 15:00:00	1962	511
856	2018-02-05 16:00:00	3116	487
857	2018-02-05 17:00:00	4444	451
858	2018-02-05 18:00:00	5571	445
859	2018-02-05 19:00:00	6243	469
860	2018-02-05 20:00:00	6383	526
861	2018-02-05 21:00:00	5880	554
862	2018-02-05 22:00:00	4918	576
863	2018-02-05 23:00:00	3816	584
864	2018-02-06	2843	566
865	2018-02-06 01:00:00	2088	534
866	2018-02-06 02:00:00	1660	514
867	2018-02-06 03:00:00	1954	479
868	2018-02-06 04:00:00	2933	460
869	2018-02-06 05:00:00	4187	439
870	2018-02-06 06:00:00	5339	443
871	2018-02-06 07:00:00	6101	456
872	2018-02-06 08:00:00	6341	496
873	2018-02-06 09:00:00	6030	544
874	2018-02-06 10:00:00	5237	606
875	2018-02-06 11:00:00	4216	640
876	2018-02-06 12:00:00	3276	633
877	2018-02-06 13:00:00	2531	621
878	2018-02-06 14:00:00	1956	594
879	2018-02-06 15:00:00	1895	559
880	2018-02-06 16:00:00	2569	548
881	2018-02-06 17:00:00	3606	539
882	2018-02-06 18:00:00	4677	521
883	2018-02-06 19:00:00	5491	531
884	2018-02-06 20:00:00	5896	541
885	2018-02-06 21:00:00	5826	550
886	2018-02-06 22:00:00	5242	569
887	2018-02-06 23:00:00	4403	569
888	2018-02-07	3549	580
889	2018-02-07 01:00:00	2836	560
890	2018-02-07 02:00:00	2283	531
891	2018-02-07 03:00:00	2054	509
892	2018-02-07 04:00:00	2437	496
893	2018-02-07 05:00:00	3322	477
894	2018-02-07 06:00:00	4324	458
895	2018-02-07 07:00:00	5170	448
896	2018-02-07 08:00:00	5684	462
897	2018-02-07 09:00:00	5779	484
898	2018-02-07 10:00:00	5425	534
899	2018-02-07 11:00:00	4699	589
900	2018-02-07 12:00:00	3908	594
901	2018-02-07 13:00:00	3269	582
902	2018-02-07 14:00:00	2683	558
903	2018-02-07 15:00:00	2261	528
904	2018-02-07 16:00:00	2422	511
905	2018-02-07 17:00:00	3049	485
906	2018-02-07 18:00:00	3851	472
907	2018-02-07 19:00:00	4680	464
908	2018-02-07 20:00:00	5285	450
909	2018-02-07 21:00:00	5555	433
910	2018-02-07 22:00:00	5416	435
911	2018-02-07 23:00:00	4918	456
912	2018-02-08	4260	467
913	2018-02-08 01:00:00	3625	462
914	2018-02-08 02:00:00	3091	445
915	2018-02-08 03:00:00	2637	431
916	2018-02-08 04:00:00	2528	417
917	2018-02-08 05:00:00	2946	411
918	2018-02-08 06:00:00	3644	390
919	2018-02-08 07:00:00	4395	372
920	2018-02-08 08:00:00	5038	367
921	2018-02-08 09:00:00	5396	377
922	2018-02-08 10:00:00	5429	406
923	2018-02-08 11:00:00	5141	445
924	2018-02-08 12:00:00	4604	464
925	2018-02-08 13:00:00	4000	474
926	2018-02-08 14:00:00	3511	474
927	2018-02-08 15:00:00	3108	468
928	2018-02-08 16:00:00	2793	456
929	2018-02-08 17:00:00	2895	439
930	2018-02-08 18:00:00	3448	414
931	2018-02-08 19:00:00	4119	395
932	2018-02-08 20:00:00	4729	372
933	2018-02-08 21:00:00	5194	364
934	2018-02-08 22:00:00	5414	380
935	2018-02-08 23:00:00	5346	402
936	2018-02-09	5002	429
937	2018-02-09 01:00:00	4509	430
938	2018-02-09 02:00:00	3960	445
939	2018-02-09 03:00:00	3431	447
940	2018-02-09 04:00:00	2994	449
941	2018-02-09 05:00:00	2880	444
942	2018-02-09 06:00:00	3167	432
943	2018-02-09 07:00:00	3675	428
944	2018-02-09 08:00:00	4247	403
945	2018-02-09 09:00:00	4733	398
946	2018-02-09 10:00:00	5021	414
947	2018-02-09 11:00:00	5118	425
948	2018-02-09 12:00:00	4941	439
949	2018-02-09 13:00:00	4517	452
950	2018-02-09 14:00:00	4060	467
951	2018-02-09 15:00:00	3629	473
952	2018-02-09 16:00:00	3175	465
953	2018-02-09 17:00:00	2848	454
954	2018-02-09 18:00:00	2874	433
955	2018-02-09 19:00:00	3243	409
956	2018-02-09 20:00:00	3776	386
957	2018-02-09 21:00:00	4286	373
958	2018-02-09 22:00:00	4722	374
959	2018-02-09 23:00:00	5015	371
960	2018-02-10	5082	392
961	2018-02-10 01:00:00	4869	425
962	2018-02-10 02:00:00	4409	445
963	2018-02-10 03:00:00	3941	455
964	2018-02-10 04:00:00	3471	462
965	2018-02-10 05:00:00	3029	467
966	2018-02-10 06:00:00	2848	458
967	2018-02-10 07:00:00	3030	429
968	2018-02-10 08:00:00	3468	420
969	2018-02-10 09:00:00	4013	398
970	2018-02-10 10:00:00	4547	380
971	2018-02-10 11:00:00	4959	372
972	2018-02-10 12:00:00	5182	357
973	2018-02-10 13:00:00	5150	373
974	2018-02-10 14:00:00	4824	377
975	2018-02-10 15:00:00	4382	386
976	2018-02-10 16:00:00	3891	395
977	2018-02-10 17:00:00	3388	378
978	2018-02-10 18:00:00	3006	355
979	2018-02-10 19:00:00	2954	339
980	2018-02-10 20:00:00	3303	326
981	2018-02-10 21:00:00	3805	313
982	2018-02-10 22:00:00	4377	296
983	2018-02-10 23:00:00	4975	297
984	2018-02-11	5417	321
985	2018-02-11 01:00:00	5556	359
986	2018-02-11 02:00:00	5233	402
987	2018-02-11 03:00:00	4753	447
988	2018-02-11 04:00:00	4268	477
989	2018-02-11 05:00:00	3608	486
990	2018-02-11 06:00:00	3056	482
991	2018-02-11 07:00:00	2838	471
992	2018-02-11 08:00:00	2936	463
993	2018-02-11 09:00:00	3351	451
994	2018-02-11 10:00:00	3963	437
995	2018-02-11 11:00:00	4606	429
996	2018-02-11 12:00:00	5171	419
997	2018-02-11 13:00:00	5424	432
998	2018-02-11 14:00:00	5304	456
999	2018-02-11 15:00:00	4957	479
1000	2018-02-11 16:00:00	4460	498
1001	2018-02-11 17:00:00	3845	504
1002	2018-02-11 18:00:00	3210	495
1003	2018-02-11 19:00:00	2716	474
1004	2018-02-11 20:00:00	2621	455
1005	2018-02-11 21:00:00	2967	425
1006	2018-02-11 22:00:00	3545	403
1007	2018-02-11 23:00:00	4254	381
1008	2018-02-12	5003	373
1009	2018-02-12 01:00:00	5542	393
1010	2018-02-12 02:00:00	5644	424
1011	2018-02-12 03:00:00	5350	463
1012	2018-02-12 04:00:00	4808	498
1013	2018-02-12 05:00:00	4095	526
1014	2018-02-12 06:00:00	3358	532
1015	2018-02-12 07:00:00	2772	514
1016	2018-02-12 08:00:00	2459	499
1017	2018-02-12 09:00:00	2584	469
1018	2018-02-12 10:00:00	3149	430
1019	2018-02-12 11:00:00	3930	404
1020	2018-02-12 12:00:00	4733	378
1021	2018-02-12 13:00:00	5364	383
1022	2018-02-12 14:00:00	5688	390
1023	2018-02-12 15:00:00	5632	409
1024	2018-02-12 16:00:00	5146	428
1025	2018-02-12 17:00:00	4426	435
1026	2018-02-12 18:00:00	3656	432
1027	2018-02-12 19:00:00	2991	424
1028	2018-02-12 20:00:00	2569	401
1029	2018-02-12 21:00:00	2531	370
1030	2018-02-12 22:00:00	3023	343
1031	2018-02-12 23:00:00	3884	325
1032	2018-02-13	4851	323
1033	2018-02-13 01:00:00	5715	338
1034	2018-02-13 02:00:00	6284	374
1035	2018-02-13 03:00:00	6412	426
1036	2018-02-13 04:00:00	6040	483
1037	2018-02-13 05:00:00	5232	525
1038	2018-02-13 06:00:00	4216	556
1039	2018-02-13 07:00:00	3300	571
1040	2018-02-13 08:00:00	2650	540
1041	2018-02-13 09:00:00	2349	518
1042	2018-02-13 10:00:00	2649	473
1043	2018-02-13 11:00:00	3429	441
1044	2018-02-13 12:00:00	4337	421
1045	2018-02-13 13:00:00	5219	403
1046	2018-02-13 14:00:00	5902	391
1047	2018-02-13 15:00:00	6125	397
1048	2018-02-13 16:00:00	5834	416
1049	2018-02-13 17:00:00	5163	458
1050	2018-02-13 18:00:00	4258	453
1051	2018-02-13 19:00:00	3367	448
1052	2018-02-13 20:00:00	2610	418
1053	2018-02-13 21:00:00	2124	388
1054	2018-02-13 22:00:00	2275	356
1055	2018-02-13 23:00:00	3071	337
1056	2018-02-14	4088	342
1057	2018-02-14 01:00:00	5133	389
1058	2018-02-14 02:00:00	6024	406
1059	2018-02-14 03:00:00	6464	449
1060	2018-02-14 04:00:00	6365	531
1061	2018-02-14 05:00:00	5732	632
1062	2018-02-14 06:00:00	4795	665
1063	2018-02-14 07:00:00	3791	654
1064	2018-02-14 08:00:00	2886	632
1065	2018-02-14 09:00:00	2270	598
1066	2018-02-14 10:00:00	2195	570
1067	2018-02-14 11:00:00	2746	536
1068	2018-02-14 12:00:00	3754	483
1069	2018-02-14 13:00:00	4888	450
1070	2018-02-14 14:00:00	5820	423
1071	2018-02-14 15:00:00	6414	430
1072	2018-02-14 16:00:00	6527	458
1073	2018-02-14 17:00:00	5984	483
1074	2018-02-14 18:00:00	5036	492
1075	2018-02-14 19:00:00	3997	472
1076	2018-02-14 20:00:00	3014	435
1077	2018-02-14 21:00:00	2224	387
1078	2018-02-14 22:00:00	1944	345
1079	2018-02-14 23:00:00	2427	297
1080	2018-02-15	3441	267
1081	2018-02-15 01:00:00	4641	247
1082	2018-02-15 02:00:00	5779	254
1083	2018-02-15 03:00:00	6574	287
1084	2018-02-15 04:00:00	6789	346
1085	2018-02-15 05:00:00	6332	418
1086	2018-02-15 06:00:00	5404	479
1087	2018-02-15 07:00:00	4242	507
1088	2018-02-15 08:00:00	3072	528
1089	2018-02-15 09:00:00	2131	513
1090	2018-02-15 10:00:00	1635	482
1091	2018-02-15 11:00:00	1893	448
1092	2018-02-15 12:00:00	2791	398
1093	2018-02-15 13:00:00	3960	365
1094	2018-02-15 14:00:00	5184	345
1095	2018-02-15 15:00:00	6165	347
1096	2018-02-15 16:00:00	6602	363
1097	2018-02-15 17:00:00	6348	386
1098	2018-02-15 18:00:00	5509	418
1099	2018-02-15 19:00:00	4400	427
1100	2018-02-15 20:00:00	3266	412
1101	2018-02-15 21:00:00	2298	373
1102	2018-02-15 22:00:00	1620	339
1103	2018-02-15 23:00:00	1599	297
1104	2018-02-16	2427	261
1105	2018-02-16 01:00:00	3705	232
1106	2018-02-16 02:00:00	5061	226
1107	2018-02-16 03:00:00	6164	249
1108	2018-02-16 04:00:00	6778	293
1109	2018-02-16 05:00:00	6744	360
1110	2018-02-16 06:00:00	5979	432
1111	2018-02-16 07:00:00	4798	486
1112	2018-02-16 08:00:00	3531	503
1113	2018-02-16 09:00:00	2434	508
1114	2018-02-16 10:00:00	1634	483
1115	2018-02-16 11:00:00	1424	439
1116	2018-02-16 12:00:00	1998	391
1117	2018-02-16 13:00:00	3126	363
1118	2018-02-16 14:00:00	4521	343
1119	2018-02-16 15:00:00	5772	336
1120	2018-02-16 16:00:00	6563	353
1121	2018-02-16 17:00:00	6735	384
1122	2018-02-16 18:00:00	6168	425
1123	2018-02-16 19:00:00	5126	452
1124	2018-02-16 20:00:00	3876	456
1125	2018-02-16 21:00:00	2703	456
1126	2018-02-16 22:00:00	1838	410
1127	2018-02-16 23:00:00	1458	356
1128	2018-02-17	1836	327
1129	2018-02-17 01:00:00	2906	300
1130	2018-02-17 02:00:00	4317	283
1131	2018-02-17 03:00:00	5702	298
1132	2018-02-17 04:00:00	6664	330
1133	2018-02-17 05:00:00	6975	384
1134	2018-02-17 06:00:00	6572	455
1135	2018-02-17 07:00:00	5562	525
1136	2018-02-17 08:00:00	4217	562
1137	2018-02-17 09:00:00	2879	568
1138	2018-02-17 10:00:00	1836	537
1139	2018-02-17 11:00:00	1255	502
1140	2018-02-17 12:00:00	1391	458
1141	2018-02-17 13:00:00	2295	421
1142	2018-02-17 14:00:00	3662	391
1143	2018-02-17 15:00:00	5094	379
1144	2018-02-17 16:00:00	6209	367
1145	2018-02-17 17:00:00	6740	387
1146	2018-02-17 18:00:00	6519	437
1147	2018-02-17 19:00:00	5656	488
1148	2018-02-17 20:00:00	4473	524
1149	2018-02-17 21:00:00	3205	516
1150	2018-02-17 22:00:00	2149	466
1151	2018-02-17 23:00:00	1468	421
1152	2018-02-18	1409	376
1153	2018-02-18 01:00:00	2117	339
1154	2018-02-18 02:00:00	3419	314
1155	2018-02-18 03:00:00	4931	307
1156	2018-02-18 04:00:00	6207	305
1157	2018-02-18 05:00:00	6944	339
1158	2018-02-18 06:00:00	6954	396
1159	2018-02-18 07:00:00	6224	476
1160	2018-02-18 08:00:00	5011	532
1161	2018-02-18 09:00:00	3618	551
1162	2018-02-18 10:00:00	2402	528
1163	2018-02-18 11:00:00	1526	497
1164	2018-02-18 12:00:00	1215	450
1165	2018-02-18 13:00:00	1733	409
1166	2018-02-18 14:00:00	2908	380
1167	2018-02-18 15:00:00	4386	349
1168	2018-02-18 16:00:00	5722	337
1169	2018-02-18 17:00:00	6552	355
1170	2018-02-18 18:00:00	6740	382
1171	2018-02-18 19:00:00	6203	427
1172	2018-02-18 20:00:00	5145	470
1173	2018-02-18 21:00:00	3866	478
1174	2018-02-18 22:00:00	2670	450
1175	2018-02-18 23:00:00	1761	411
1176	2018-02-19	1304	369
1177	2018-02-19 01:00:00	1616	331
1178	2018-02-19 02:00:00	2652	300
1179	2018-02-19 03:00:00	4073	284
1180	2018-02-19 04:00:00	5506	277
1181	2018-02-19 05:00:00	6549	289
1182	2018-02-19 06:00:00	6975	338
1183	2018-02-19 07:00:00	6642	406
1184	2018-02-19 08:00:00	5649	474
1185	2018-02-19 09:00:00	4351	507
1186	2018-02-19 10:00:00	3040	504
1187	2018-02-19 11:00:00	1985	491
1188	2018-02-19 12:00:00	1320	453
1189	2018-02-19 13:00:00	1364	415
1190	2018-02-19 14:00:00	2220	388
1191	2018-02-19 15:00:00	3526	357
1192	2018-02-19 16:00:00	4958	342
1193	2018-02-19 17:00:00	6112	344
1194	2018-02-19 18:00:00	6658	373
1195	2018-02-19 19:00:00	6507	416
1196	2018-02-19 20:00:00	5743	462
1197	2018-02-19 21:00:00	4604	489
1198	2018-02-19 22:00:00	3351	492
1199	2018-02-19 23:00:00	2311	468
1200	2018-02-20	1585	434
1201	2018-02-20 01:00:00	1401	398
1202	2018-02-20 02:00:00	2026	371
1203	2018-02-20 03:00:00	3224	343
1204	2018-02-20 04:00:00	4650	329
1205	2018-02-20 05:00:00	5911	337
1206	2018-02-20 06:00:00	6651	371
1207	2018-02-20 07:00:00	6746	418
1208	2018-02-20 08:00:00	6160	485
1209	2018-02-20 09:00:00	5055	541
1210	2018-02-20 10:00:00	3744	567
1211	2018-02-20 11:00:00	2568	559
1212	2018-02-20 12:00:00	1710	528
1213	2018-02-20 13:00:00	1306	488
1214	2018-02-20 14:00:00	1646	446
1215	2018-02-20 15:00:00	2677	402
1216	2018-02-20 16:00:00	4034	388
1217	2018-02-20 17:00:00	5320	381
1218	2018-02-20 18:00:00	6166	378
1219	2018-02-20 19:00:00	6417	402
1220	2018-02-20 20:00:00	6041	449
1221	2018-02-20 21:00:00	5146	478
1222	2018-02-20 22:00:00	4006	492
1223	2018-02-20 23:00:00	2908	494
1224	2018-02-21	2056	473
1225	2018-02-21 01:00:00	1538	438
1226	2018-02-21 02:00:00	1652	406
1227	2018-02-21 03:00:00	2476	391
1228	2018-02-21 04:00:00	3705	373
1229	2018-02-21 05:00:00	5011	366
1230	2018-02-21 06:00:00	6003	374
1231	2018-02-21 07:00:00	6479	403
1232	2018-02-21 08:00:00	6348	445
1233	2018-02-21 09:00:00	5609	488
1234	2018-02-21 10:00:00	4512	523
1235	2018-02-21 11:00:00	3353	537
1236	2018-02-21 12:00:00	2436	510
1237	2018-02-21 13:00:00	1786	482
1238	2018-02-21 14:00:00	1631	453
1239	2018-02-21 15:00:00	2209	430
1240	2018-02-21 16:00:00	3301	407
1241	2018-02-21 17:00:00	4532	395
1242	2018-02-21 18:00:00	5531	390
1243	2018-02-21 19:00:00	6119	409
1244	2018-02-21 20:00:00	6221	438
1245	2018-02-21 21:00:00	5685	490
1246	2018-02-21 22:00:00	4741	530
1247	2018-02-21 23:00:00	3722	549
1248	2018-02-22	2843	543
1249	2018-02-22 01:00:00	2172	528
1250	2018-02-22 02:00:00	1850	503
1251	2018-02-22 03:00:00	2174	488
1252	2018-02-22 04:00:00	3049	474
1253	2018-02-22 05:00:00	4169	469
1254	2018-02-22 06:00:00	5238	462
1255	2018-02-22 07:00:00	5979	464
1256	2018-02-22 08:00:00	6274	498
1257	2018-02-22 09:00:00	6001	550
1258	2018-02-22 10:00:00	5209	595
1259	2018-02-22 11:00:00	4233	632
1260	2018-02-22 12:00:00	3309	633
1261	2018-02-22 13:00:00	2536	609
1262	2018-02-22 14:00:00	2018	580
1263	2018-02-22 15:00:00	2067	542
1264	2018-02-22 16:00:00	2740	520
1265	2018-02-22 17:00:00	3744	488
1266	2018-02-22 18:00:00	4775	465
1267	2018-02-22 19:00:00	5535	460
1268	2018-02-22 20:00:00	5938	469
1269	2018-02-22 21:00:00	5894	501
1270	2018-02-22 22:00:00	5302	534
1271	2018-02-22 23:00:00	4468	567
1272	2018-02-23	3680	570
1273	2018-02-23 01:00:00	3027	559
1274	2018-02-23 02:00:00	2435	553
1275	2018-02-23 03:00:00	2162	546
1276	2018-02-23 04:00:00	2560	538
1277	2018-02-23 05:00:00	3398	525
1278	2018-02-23 06:00:00	4317	503
1279	2018-02-23 07:00:00	5119	488
1280	2018-02-23 08:00:00	5711	488
1281	2018-02-23 09:00:00	5962	513
1282	2018-02-23 10:00:00	5655	552
1283	2018-02-23 11:00:00	4942	584
1284	2018-02-23 12:00:00	4144	589
1285	2018-02-23 13:00:00	3441	598
1286	2018-02-23 14:00:00	2820	577
1287	2018-02-23 15:00:00	2398	552
1288	2018-02-23 16:00:00	2497	524
1289	2018-02-23 17:00:00	3117	496
1290	2018-02-23 18:00:00	3956	465
1291	2018-02-23 19:00:00	4747	428
1292	2018-02-23 20:00:00	5355	434
1293	2018-02-23 21:00:00	5696	447
1294	2018-02-23 22:00:00	5649	477
1295	2018-02-23 23:00:00	5209	521
1296	2018-02-24	4571	544
1297	2018-02-24 01:00:00	3919	554
1298	2018-02-24 02:00:00	3300	561
1299	2018-02-24 03:00:00	2760	571
1300	2018-02-24 04:00:00	2542	571
1301	2018-02-24 05:00:00	2827	558
1302	2018-02-24 06:00:00	3474	540
1303	2018-02-24 07:00:00	4228	518
1304	2018-02-24 08:00:00	4901	501
1305	2018-02-24 09:00:00	5412	500
1306	2018-02-24 10:00:00	5658	526
1307	2018-02-24 11:00:00	5486	554
1308	2018-02-24 12:00:00	4963	570
1309	2018-02-24 13:00:00	4328	587
1310	2018-02-24 14:00:00	3724	604
1311	2018-02-24 15:00:00	3128	593
1312	2018-02-24 16:00:00	2677	582
1313	2018-02-24 17:00:00	2673	565
1314	2018-02-24 18:00:00	3131	537
1315	2018-02-24 19:00:00	3808	504
1316	2018-02-24 20:00:00	4494	485
1317	2018-02-24 21:00:00	5060	485
1318	2018-02-24 22:00:00	5454	504
1319	2018-02-24 23:00:00	5558	538
1320	2018-02-25	5276	568
1321	2018-02-25 01:00:00	4753	604
1322	2018-02-25 02:00:00	4193	621
1323	2018-02-25 03:00:00	3570	639
1324	2018-02-25 04:00:00	2910	645
1325	2018-02-25 05:00:00	2543	634
1326	2018-02-25 06:00:00	2676	602
1327	2018-02-25 07:00:00	3165	582
1328	2018-02-25 08:00:00	3814	547
1329	2018-02-25 09:00:00	4493	529
1330	2018-02-25 10:00:00	5104	515
1331	2018-02-25 11:00:00	5515	512
1332	2018-02-25 12:00:00	5544	526
1333	2018-02-25 13:00:00	5193	542
1334	2018-02-25 14:00:00	4644	560
1335	2018-02-25 15:00:00	4010	581
1336	2018-02-25 16:00:00	3329	576
1337	2018-02-25 17:00:00	2725	551
1338	2018-02-25 18:00:00	2504	506
1339	2018-02-25 19:00:00	2776	481
1340	2018-02-25 20:00:00	3369	440
1341	2018-02-25 21:00:00	4093	415
1342	2018-02-25 22:00:00	4795	398
1343	2018-02-25 23:00:00	5380	400
1344	2018-02-26	5702	418
1345	2018-02-26 01:00:00	5604	459
1346	2018-02-26 02:00:00	5134	499
1347	2018-02-26 03:00:00	4483	551
1348	2018-02-26 04:00:00	3764	568
1349	2018-02-26 05:00:00	3016	568
1350	2018-02-26 06:00:00	2446	570
1351	2018-02-26 07:00:00	2332	552
1352	2018-02-26 08:00:00	2667	520
1353	2018-02-26 09:00:00	3323	495
1354	2018-02-26 10:00:00	4163	475
1355	2018-02-26 11:00:00	4994	458
1356	2018-02-26 12:00:00	5611	447
1357	2018-02-26 13:00:00	5864	478
1358	2018-02-26 14:00:00	5631	512
1359	2018-02-26 15:00:00	4997	539
1360	2018-02-26 16:00:00	4207	564
1361	2018-02-26 17:00:00	3370	567
1362	2018-02-26 18:00:00	2564	558
1363	2018-02-26 19:00:00	2108	526
1364	2018-02-26 20:00:00	2268	502
1365	2018-02-26 21:00:00	2894	474
1366	2018-02-26 22:00:00	3763	436
1367	2018-02-26 23:00:00	4713	431
1368	2018-02-27	5525	449
1369	2018-02-27 01:00:00	6054	490
1370	2018-02-27 02:00:00	6091	556
1371	2018-02-27 03:00:00	5585	624
1372	2018-02-27 04:00:00	4769	678
1373	2018-02-27 05:00:00	3838	695
1374	2018-02-27 06:00:00	2911	700
1375	2018-02-27 07:00:00	2143	697
1376	2018-02-27 08:00:00	1816	677
1377	2018-02-27 09:00:00	2154	642
1378	2018-02-27 10:00:00	2991	598
1379	2018-02-27 11:00:00	4046	559
1380	2018-02-27 12:00:00	5121	539
1381	2018-02-27 13:00:00	5996	534
1382	2018-02-27 14:00:00	6397	551
1383	2018-02-27 15:00:00	6131	590
1384	2018-02-27 16:00:00	5348	621
1385	2018-02-27 17:00:00	4365	644
1386	2018-02-27 18:00:00	3335	644
1387	2018-02-27 19:00:00	2406	618
1388	2018-02-27 20:00:00	1788	577
1389	2018-02-27 21:00:00	1841	527
1390	2018-02-27 22:00:00	2615	489
1391	2018-02-27 23:00:00	3750	447
1392	2018-02-28	4936	436
1393	2018-02-28 01:00:00	5951	453
1394	2018-02-28 02:00:00	6620	503
1395	2018-02-28 03:00:00	6658	582
1396	2018-02-28 04:00:00	6006	654
1397	2018-02-28 05:00:00	4991	693
1398	2018-02-28 06:00:00	3830	733
1399	2018-02-28 07:00:00	2680	726
1400	2018-02-28 08:00:00	1762	710
1401	2018-02-28 09:00:00	1404	692
1402	2018-02-28 10:00:00	1830	657
1403	2018-02-28 11:00:00	2865	608
1404	2018-02-28 12:00:00	4188	581
1405	2018-02-28 13:00:00	5505	562
1406	2018-02-28 14:00:00	6507	574
1407	2018-02-28 15:00:00	6939	615
1408	2018-02-28 16:00:00	6582	672
1409	2018-02-28 17:00:00	5658	716
1410	2018-02-28 18:00:00	4459	748
1411	2018-02-28 19:00:00	3197	745
1412	2018-02-28 20:00:00	2116	737
1413	2018-02-28 21:00:00	1469	715
1414	2018-02-28 22:00:00	1664	687
1415	2018-02-28 23:00:00	2645	669
1416	2018-03-01	3975	668
1417	2018-03-01 01:00:00	5370	658
1418	2018-03-01 02:00:00	6572	671
1419	2018-03-01 03:00:00	7275	728
1420	2018-03-01 04:00:00	7193	803
1421	2018-03-01 05:00:00	6364	870
1422	2018-03-01 06:00:00	5160	924
1423	2018-03-01 07:00:00	3763	940
1424	2018-03-01 08:00:00	2448	923
1425	2018-03-01 09:00:00	1466	902
1426	2018-03-01 10:00:00	1171	863
1427	2018-03-01 11:00:00	1809	830
1428	2018-03-01 12:00:00	3105	785
1429	2018-03-01 13:00:00	4650	739
1430	2018-03-01 14:00:00	6088	722
1431	2018-03-01 15:00:00	7162	731
1432	2018-03-01 16:00:00	7552	770
1433	2018-03-01 17:00:00	6967	816
1434	2018-03-01 18:00:00	5829	866
1435	2018-03-01 19:00:00	4479	869
1436	2018-03-01 20:00:00	3113	858
1437	2018-03-01 21:00:00	1993	853
1438	2018-03-01 22:00:00	1446	818
1439	2018-03-01 23:00:00	1836	792
1440	2018-03-02	3016	752
1441	2018-03-02 01:00:00	4570	735
1442	2018-03-02 02:00:00	6134	729
1443	2018-03-02 03:00:00	7350	775
1444	2018-03-02 04:00:00	7895	846
1445	2018-03-02 05:00:00	7539	917
1446	2018-03-02 06:00:00	6580	981
1447	2018-03-02 07:00:00	5274	976
1448	2018-03-02 08:00:00	3716	966
1449	2018-03-02 09:00:00	2265	966
1450	2018-03-02 10:00:00	1229	919
1451	2018-03-02 11:00:00	1078	869
1452	2018-03-02 12:00:00	1968	827
1453	2018-03-02 13:00:00	3502	855
1454	2018-03-02 14:00:00	5185	824
1455	2018-03-02 15:00:00	6592	837
1456	2018-03-02 16:00:00	7502	827
1457	2018-03-02 17:00:00	7619	860
1458	2018-03-02 18:00:00	6804	870
1459	2018-03-02 19:00:00	5487	903
1460	2018-03-02 20:00:00	3993	859
1461	2018-03-02 21:00:00	2554	843
1462	2018-03-02 22:00:00	1431	793
1463	2018-03-02 23:00:00	1092	764
1464	2018-03-03	1799	736
1465	2018-03-03 01:00:00	3209	752
1466	2018-03-03 02:00:00	4925	764
1467	2018-03-03 03:00:00	6539	772
1468	2018-03-03 04:00:00	7636	794
1469	2018-03-03 05:00:00	7982	857
1470	2018-03-03 06:00:00	7437	936
1471	2018-03-03 07:00:00	6217	984
1472	2018-03-03 08:00:00	4658	1010
1473	2018-03-03 09:00:00	3130	1024
1474	2018-03-03 10:00:00	1876	964
1475	2018-03-03 11:00:00	1112	896
1476	2018-03-03 12:00:00	1260	846
1477	2018-03-03 13:00:00	2401	786
1478	2018-03-03 14:00:00	4060	759
1479	2018-03-03 15:00:00	5748	712
1480	2018-03-03 16:00:00	7083	704
1481	2018-03-03 17:00:00	7763	718
1482	2018-03-03 18:00:00	7508	755
1483	2018-03-03 19:00:00	6496	805
1484	2018-03-03 20:00:00	5108	810
1485	2018-03-03 21:00:00	3607	793
1486	2018-03-03 22:00:00	2288	762
1487	2018-03-03 23:00:00	1360	729
1488	2018-03-04	1282	711
1489	2018-03-04 01:00:00	2224	681
1490	2018-03-04 02:00:00	3781	646
1491	2018-03-04 03:00:00	5512	643
1492	2018-03-04 04:00:00	6958	647
1493	2018-03-04 05:00:00	7829	693
1494	2018-03-04 06:00:00	7864	747
1495	2018-03-04 07:00:00	6992	826
1496	2018-03-04 08:00:00	5632	884
1497	2018-03-04 09:00:00	4115	888
1498	2018-03-04 10:00:00	2727	888
1499	2018-03-04 11:00:00	1639	845
1500	2018-03-04 12:00:00	1160	794
1501	2018-03-04 13:00:00	1680	757
1502	2018-03-04 14:00:00	3013	728
1503	2018-03-04 15:00:00	4687	714
1504	2018-03-04 16:00:00	6243	698
1505	2018-03-04 17:00:00	7313	698
1506	2018-03-04 18:00:00	7642	725
1507	2018-03-04 19:00:00	7071	776
1508	2018-03-04 20:00:00	5897	806
1509	2018-03-04 21:00:00	4460	820
1510	2018-03-04 22:00:00	3058	793
1511	2018-03-04 23:00:00	1926	767
1512	2018-03-05	1297	728
1513	2018-03-05 01:00:00	1582	696
1514	2018-03-05 02:00:00	2743	673
1515	2018-03-05 03:00:00	4336	645
1516	2018-03-05 04:00:00	5931	642
1517	2018-03-05 05:00:00	7132	650
1518	2018-03-05 06:00:00	7677	687
1519	2018-03-05 07:00:00	7377	740
1520	2018-03-05 08:00:00	6380	785
1521	2018-03-05 09:00:00	5038	822
1522	2018-03-05 10:00:00	3669	832
1523	2018-03-05 11:00:00	2518	802
1524	2018-03-05 12:00:00	1735	778
1525	2018-03-05 13:00:00	1627	752
1526	2018-03-05 14:00:00	2397	714
1527	2018-03-05 15:00:00	3767	692
1528	2018-03-05 16:00:00	5323	682
1529	2018-03-05 17:00:00	6602	688
1530	2018-03-05 18:00:00	7291	708
1531	2018-03-05 19:00:00	7266	763
1532	2018-03-05 20:00:00	6538	825
1533	2018-03-05 21:00:00	5323	868
1534	2018-03-05 22:00:00	3976	872
1535	2018-03-05 23:00:00	2817	870
1536	2018-03-06	1939	846
1537	2018-03-06 01:00:00	1608	817
1538	2018-03-06 02:00:00	2183	789
1539	2018-03-06 03:00:00	3433	768
1540	2018-03-06 04:00:00	4935	756
1541	2018-03-06 05:00:00	6280	755
1542	2018-03-06 06:00:00	7118	772
1543	2018-03-06 07:00:00	7278	824
1544	2018-03-06 08:00:00	6708	879
1545	2018-03-06 09:00:00	5659	914
1546	2018-03-06 10:00:00	4437	932
1547	2018-03-06 11:00:00	3322	909
1548	2018-03-06 12:00:00	2455	880
1549	2018-03-06 13:00:00	1942	839
1550	2018-03-06 14:00:00	2122	803
1551	2018-03-06 15:00:00	3057	781
1552	2018-03-06 16:00:00	4402	748
1553	2018-03-06 17:00:00	5721	746
1554	2018-03-06 18:00:00	6626	740
1555	2018-03-06 19:00:00	6985	755
1556	2018-03-06 20:00:00	6698	777
1557	2018-03-06 21:00:00	5813	806
1558	2018-03-06 22:00:00	4663	843
1559	2018-03-06 23:00:00	3557	830
1560	2018-03-07	2691	824
1561	2018-03-07 01:00:00	2104	807
1562	2018-03-07 02:00:00	2075	827
1563	2018-03-07 03:00:00	2800	828
1564	2018-03-07 04:00:00	3986	787
1565	2018-03-07 05:00:00	5243	767
1566	2018-03-07 06:00:00	6215	770
1567	2018-03-07 07:00:00	6688	773
1568	2018-03-07 08:00:00	6584	819
1569	2018-03-07 09:00:00	5894	843
1570	2018-03-07 10:00:00	4902	877
1571	2018-03-07 11:00:00	3899	878
1572	2018-03-07 12:00:00	3078	872
1573	2018-03-07 13:00:00	2436	835
1574	2018-03-07 14:00:00	2211	804
1575	2018-03-07 15:00:00	2679	768
1576	2018-03-07 16:00:00	3633	734
1577	2018-03-07 17:00:00	4764	726
1578	2018-03-07 18:00:00	5744	714
1579	2018-03-07 19:00:00	6325	695
1580	2018-03-07 20:00:00	6442	689
1581	2018-03-07 21:00:00	6011	709
1582	2018-03-07 22:00:00	5173	721
1583	2018-03-07 23:00:00	4249	720
1584	2018-03-08	3478	705
1585	2018-03-08 01:00:00	2879	675
1586	2018-03-08 02:00:00	2508	667
1587	2018-03-08 03:00:00	2726	644
1588	2018-03-08 04:00:00	3498	630
1589	2018-03-08 05:00:00	4481	620
1590	2018-03-08 06:00:00	5423	608
1591	2018-03-08 07:00:00	6063	617
1592	2018-03-08 08:00:00	6291	639
1593	2018-03-08 09:00:00	6028	678
1594	2018-03-08 10:00:00	5340	708
1595	2018-03-08 11:00:00	4545	729
1596	2018-03-08 12:00:00	3822	727
1597	2018-03-08 13:00:00	3234	712
1598	2018-03-08 14:00:00	2832	703
1599	2018-03-08 15:00:00	2824	695
1600	2018-03-08 16:00:00	3331	689
1601	2018-03-08 17:00:00	4169	686
1602	2018-03-08 18:00:00	5050	684
1603	2018-03-08 19:00:00	5684	678
1604	2018-03-08 20:00:00	5996	681
1605	2018-03-08 21:00:00	5969	702
1606	2018-03-08 22:00:00	5502	717
1607	2018-03-08 23:00:00	4804	735
1608	2018-03-09	4120	732
1609	2018-03-09 01:00:00	3568	716
1610	2018-03-09 02:00:00	3114	705
1611	2018-03-09 03:00:00	2929	694
1612	2018-03-09 04:00:00	3283	684
1613	2018-03-09 05:00:00	3966	678
1614	2018-03-09 06:00:00	4727	664
1615	2018-03-09 07:00:00	5372	650
1616	2018-03-09 08:00:00	5749	641
1617	2018-03-09 09:00:00	5855	651
1618	2018-03-09 10:00:00	5566	675
1619	2018-03-09 11:00:00	4997	688
1620	2018-03-09 12:00:00	4466	688
1621	2018-03-09 13:00:00	4016	678
1622	2018-03-09 14:00:00	3578	675
1623	2018-03-09 15:00:00	3258	659
1624	2018-03-09 16:00:00	3348	640
1625	2018-03-09 17:00:00	3837	634
1626	2018-03-09 18:00:00	4470	622
1627	2018-03-09 19:00:00	5058	608
1628	2018-03-09 20:00:00	5493	610
1629	2018-03-09 21:00:00	5736	620
1630	2018-03-09 22:00:00	5666	650
1631	2018-03-09 23:00:00	5279	687
1632	2018-03-10	4773	705
1633	2018-03-10 01:00:00	4295	716
1634	2018-03-10 02:00:00	3867	723
1635	2018-03-10 03:00:00	3518	713
1636	2018-03-10 04:00:00	3429	733
1637	2018-03-10 05:00:00	3683	728
1638	2018-03-10 06:00:00	4184	717
1639	2018-03-10 07:00:00	4763	703
1640	2018-03-10 08:00:00	5239	701
1641	2018-03-10 09:00:00	5498	702
1642	2018-03-10 10:00:00	5486	711
1643	2018-03-10 11:00:00	5260	721
1644	2018-03-10 12:00:00	4940	725
1645	2018-03-10 13:00:00	4541	721
1646	2018-03-10 14:00:00	4124	715
1647	2018-03-10 15:00:00	3766	711
1648	2018-03-10 16:00:00	3551	721
1649	2018-03-10 17:00:00	3587	713
1650	2018-03-10 18:00:00	3871	706
1651	2018-03-10 19:00:00	4332	699
1652	2018-03-10 20:00:00	4826	689
1653	2018-03-10 21:00:00	5203	691
1654	2018-03-10 22:00:00	5420	686
1655	2018-03-10 23:00:00	5444	705
1656	2018-03-11	5264	733
1657	2018-03-11 01:00:00	4933	734
1658	2018-03-11 02:00:00	4484	773
1659	2018-03-11 03:00:00	4072	780
1660	2018-03-11 04:00:00	3776	777
1661	2018-03-11 05:00:00	3622	783
1662	2018-03-11 06:00:00	3730	797
1663	2018-03-11 07:00:00	4082	781
1664	2018-03-11 08:00:00	4564	780
1665	2018-03-11 09:00:00	5023	765
1666	2018-03-11 10:00:00	5347	785
1667	2018-03-11 11:00:00	5583	779
1668	2018-03-11 12:00:00	5583	788
1669	2018-03-11 13:00:00	5343	797
1670	2018-03-11 14:00:00	5007	804
1671	2018-03-11 15:00:00	4660	802
1672	2018-03-11 16:00:00	4297	809
1673	2018-03-11 17:00:00	3955	825
1674	2018-03-11 18:00:00	3867	861
1675	2018-03-11 19:00:00	4054	865
1676	2018-03-11 20:00:00	4405	896
1677	2018-03-11 21:00:00	4830	1023
1678	2018-03-11 22:00:00	5200	998
1679	2018-03-11 23:00:00	5513	1018
1680	2018-03-12	5702	984
1681	2018-03-12 01:00:00	5596	969
1682	2018-03-12 02:00:00	5202	966
1683	2018-03-12 03:00:00	4674	958
1684	2018-03-12 04:00:00	4208	946
1685	2018-03-12 05:00:00	3783	940
1686	2018-03-12 06:00:00	3422	900
1687	2018-03-12 07:00:00	3377	896
1688	2018-03-12 08:00:00	3674	852
1689	2018-03-12 09:00:00	4103	865
1690	2018-03-12 10:00:00	4572	836
1691	2018-03-12 11:00:00	5056	812
1692	2018-03-12 12:00:00	5426	799
1693	2018-03-12 13:00:00	5501	801
1694	2018-03-12 14:00:00	5305	790
1695	2018-03-12 15:00:00	4976	759
1696	2018-03-12 16:00:00	4471	778
1697	2018-03-12 17:00:00	3822	759
1698	2018-03-12 18:00:00	3276	733
1699	2018-03-12 19:00:00	3110	720
1700	2018-03-12 20:00:00	3260	693
1701	2018-03-12 21:00:00	3629	680
1702	2018-03-12 22:00:00	4206	667
1703	2018-03-12 23:00:00	4861	661
1704	2018-03-13	5382	656
1705	2018-03-13 01:00:00	5616	657
1706	2018-03-13 02:00:00	5533	682
1707	2018-03-13 03:00:00	5183	706
1708	2018-03-13 04:00:00	4599	713
1709	2018-03-13 05:00:00	3929	723
1710	2018-03-13 06:00:00	3334	721
1711	2018-03-13 07:00:00	2929	707
1712	2018-03-13 08:00:00	2885	686
1713	2018-03-13 09:00:00	3241	665
1714	2018-03-13 10:00:00	3840	633
1715	2018-03-13 11:00:00	4541	622
1716	2018-03-13 12:00:00	5191	589
1717	2018-03-13 13:00:00	5643	601
1718	2018-03-13 14:00:00	5758	622
1719	2018-03-13 15:00:00	5486	622
1720	2018-03-13 16:00:00	4958	646
1721	2018-03-13 17:00:00	4299	662
1722	2018-03-13 18:00:00	3629	656
1723	2018-03-13 19:00:00	3067	626
1724	2018-03-13 20:00:00	2816	602
1725	2018-03-13 21:00:00	3029	559
1726	2018-03-13 22:00:00	3643	530
1727	2018-03-13 23:00:00	4457	493
1728	2018-03-14	5278	494
1729	2018-03-14 01:00:00	5953	501
1730	2018-03-14 02:00:00	6249	534
1731	2018-03-14 03:00:00	6073	581
1732	2018-03-14 04:00:00	5483	633
1733	2018-03-14 05:00:00	4687	673
1734	2018-03-14 06:00:00	3889	671
1735	2018-03-14 07:00:00	3215	671
1736	2018-03-14 08:00:00	2807	658
1737	2018-03-14 09:00:00	2871	623
1738	2018-03-14 10:00:00	3393	583
1739	2018-03-14 11:00:00	4187	552
1740	2018-03-14 12:00:00	5124	520
1741	2018-03-14 13:00:00	5951	508
1742	2018-03-14 14:00:00	6438	528
1743	2018-03-14 15:00:00	6439	566
1744	2018-03-14 16:00:00	5989	601
1745	2018-03-14 17:00:00	5204	605
1746	2018-03-14 18:00:00	4314	616
1747	2018-03-14 19:00:00	3506	614
1748	2018-03-14 20:00:00	2901	603
1749	2018-03-14 21:00:00	2735	568
1750	2018-03-14 22:00:00	3158	558
1751	2018-03-14 23:00:00	3980	540
1752	2018-03-15	4991	540
1753	2018-03-15 01:00:00	5942	565
1754	2018-03-15 02:00:00	6591	640
1755	2018-03-15 03:00:00	6764	678
1756	2018-03-15 04:00:00	6348	736
1757	2018-03-15 05:00:00	5533	783
1758	2018-03-15 06:00:00	4543	812
1759	2018-03-15 07:00:00	3550	828
1760	2018-03-15 08:00:00	2764	824
1761	2018-03-15 09:00:00	2405	821
1762	2018-03-15 10:00:00	2671	789
1763	2018-03-15 11:00:00	3446	737
1764	2018-03-15 12:00:00	4487	707
1765	2018-03-15 13:00:00	5548	699
1766	2018-03-15 14:00:00	6345	716
1767	2018-03-15 15:00:00	6706	730
1768	2018-03-15 16:00:00	6457	773
1769	2018-03-15 17:00:00	5701	797
1770	2018-03-15 18:00:00	4723	798
1771	2018-03-15 19:00:00	3674	781
1772	2018-03-15 20:00:00	2780	778
1773	2018-03-15 21:00:00	2216	732
1774	2018-03-15 22:00:00	2230	696
1775	2018-03-15 23:00:00	2946	667
1776	2018-03-16	4068	658
1777	2018-03-16 01:00:00	5266	645
1778	2018-03-16 02:00:00	6279	657
1779	2018-03-16 03:00:00	6873	689
1780	2018-03-16 04:00:00	6829	735
1781	2018-03-16 05:00:00	6114	764
1782	2018-03-16 06:00:00	5047	791
1783	2018-03-16 07:00:00	3874	814
1784	2018-03-16 08:00:00	2807	805
1785	2018-03-16 09:00:00	2051	754
1786	2018-03-16 10:00:00	1891	723
1787	2018-03-16 11:00:00	2456	695
1788	2018-03-16 12:00:00	3516	665
1789	2018-03-16 13:00:00	4792	627
1790	2018-03-16 14:00:00	5960	628
1791	2018-03-16 15:00:00	6725	646
1792	2018-03-16 16:00:00	6875	664
1793	2018-03-16 17:00:00	6347	692
1794	2018-03-16 18:00:00	5365	719
1795	2018-03-16 19:00:00	4177	726
1796	2018-03-16 20:00:00	3053	706
1797	2018-03-16 21:00:00	2171	689
1798	2018-03-16 22:00:00	1764	671
1799	2018-03-16 23:00:00	2163	621
1800	2018-03-17	3217	592
1801	2018-03-17 01:00:00	4558	571
1802	2018-03-17 02:00:00	5873	570
1803	2018-03-17 03:00:00	6843	586
1804	2018-03-17 04:00:00	7222	649
1805	2018-03-17 05:00:00	6823	708
1806	2018-03-17 06:00:00	5831	750
1807	2018-03-17 07:00:00	4568	770
1808	2018-03-17 08:00:00	3290	762
1809	2018-03-17 09:00:00	2255	738
1810	2018-03-17 10:00:00	1676	702
1811	2018-03-17 11:00:00	1819	670
1812	2018-03-17 12:00:00	2690	640
1813	2018-03-17 13:00:00	4011	607
1814	2018-03-17 14:00:00	5421	575
1815	2018-03-17 15:00:00	6511	586
1816	2018-03-17 16:00:00	7060	622
1817	2018-03-17 17:00:00	6889	676
1818	2018-03-17 18:00:00	6038	706
1819	2018-03-17 19:00:00	4854	733
1820	2018-03-17 20:00:00	3552	731
1821	2018-03-17 21:00:00	2428	717
1822	2018-03-17 22:00:00	1683	689
1823	2018-03-17 23:00:00	1580	666
1824	2018-03-18	2322	632
1825	2018-03-18 01:00:00	3646	604
1826	2018-03-18 02:00:00	5162	584
1827	2018-03-18 03:00:00	6472	623
1828	2018-03-18 04:00:00	7259	676
1829	2018-03-18 05:00:00	7319	722
1830	2018-03-18 06:00:00	6556	786
1831	2018-03-18 07:00:00	5320	841
1832	2018-03-18 08:00:00	3936	855
1833	2018-03-18 09:00:00	2651	843
1834	2018-03-18 10:00:00	1696	827
1835	2018-03-18 11:00:00	1365	782
1836	2018-03-18 12:00:00	1896	738
1837	2018-03-18 13:00:00	3071	697
1838	2018-03-18 14:00:00	4585	687
1839	2018-03-18 15:00:00	5998	677
1840	2018-03-18 16:00:00	6917	684
1841	2018-03-18 17:00:00	7169	718
1842	2018-03-18 18:00:00	6653	753
1843	2018-03-18 19:00:00	5565	762
1844	2018-03-18 20:00:00	4233	766
1845	2018-03-18 21:00:00	2909	758
1846	2018-03-18 22:00:00	1862	720
1847	2018-03-18 23:00:00	1328	688
1848	2018-03-19	1633	664
1849	2018-03-19 01:00:00	2717	638
1850	2018-03-19 02:00:00	4212	589
1851	2018-03-19 03:00:00	5737	549
1852	2018-03-19 04:00:00	6884	584
1853	2018-03-19 05:00:00	7393	631
1854	2018-03-19 06:00:00	7073	681
1855	2018-03-19 07:00:00	6062	707
1856	2018-03-19 08:00:00	4691	748
1857	2018-03-19 09:00:00	3239	742
1858	2018-03-19 10:00:00	2029	719
1859	2018-03-19 11:00:00	1269	693
1860	2018-03-19 12:00:00	1289	667
1861	2018-03-19 13:00:00	2182	603
1862	2018-03-19 14:00:00	3586	580
1863	2018-03-19 15:00:00	5129	554
1864	2018-03-19 16:00:00	6399	564
1865	2018-03-19 17:00:00	7059	591
1866	2018-03-19 18:00:00	6919	635
1867	2018-03-19 19:00:00	6052	678
1868	2018-03-19 20:00:00	4826	693
1869	2018-03-19 21:00:00	3444	697
1870	2018-03-19 22:00:00	2209	683
1871	2018-03-19 23:00:00	1302	664
1872	2018-03-20	1071	616
1873	2018-03-20 01:00:00	1758	586
1874	2018-03-20 02:00:00	3057	567
1875	2018-03-20 03:00:00	4611	569
1876	2018-03-20 04:00:00	6035	585
1877	2018-03-20 05:00:00	6933	653
1878	2018-03-20 06:00:00	7109	688
1879	2018-03-20 07:00:00	6440	724
1880	2018-03-20 08:00:00	5234	770
1881	2018-03-20 09:00:00	3813	813
1882	2018-03-20 10:00:00	2466	815
1883	2018-03-20 11:00:00	1451	800
1884	2018-03-20 12:00:00	1007	750
1885	2018-03-20 13:00:00	1405	703
1886	2018-03-20 14:00:00	2526	678
1887	2018-03-20 15:00:00	4047	655
1888	2018-03-20 16:00:00	5526	644
1889	2018-03-20 17:00:00	6531	633
1890	2018-03-20 18:00:00	6896	660
1891	2018-03-20 19:00:00	6463	688
1892	2018-03-20 20:00:00	5423	721
1893	2018-03-20 21:00:00	4120	735
1894	2018-03-20 22:00:00	2798	717
1895	2018-03-20 23:00:00	1724	700
1896	2018-03-21	1087	668
1897	2018-03-21 01:00:00	1231	624
1898	2018-03-21 02:00:00	2162	597
1899	2018-03-21 03:00:00	3555	583
1900	2018-03-21 04:00:00	5079	538
1901	2018-03-21 05:00:00	6296	532
1902	2018-03-21 06:00:00	6906	553
1903	2018-03-21 07:00:00	6755	616
1904	2018-03-21 08:00:00	5885	677
1905	2018-03-21 09:00:00	4628	692
1906	2018-03-21 10:00:00	3270	691
1907	2018-03-21 11:00:00	2106	684
1908	2018-03-21 12:00:00	1311	647
1909	2018-03-21 13:00:00	1209	603
1910	2018-03-21 14:00:00	1922	581
1911	2018-03-21 15:00:00	3169	551
1912	2018-03-21 16:00:00	4647	511
1913	2018-03-21 17:00:00	5902	510
1914	2018-03-21 18:00:00	6599	528
1915	2018-03-21 19:00:00	6652	567
1916	2018-03-21 20:00:00	6026	633
1917	2018-03-21 21:00:00	4935	671
1918	2018-03-21 22:00:00	3662	669
1919	2018-03-21 23:00:00	2532	640
1920	2018-03-22	1686	586
1921	2018-03-22 01:00:00	1301	559
1922	2018-03-22 02:00:00	1717	513
1923	2018-03-22 03:00:00	2789	483
1924	2018-03-22 04:00:00	4169	450
1925	2018-03-22 05:00:00	5502	439
1926	2018-03-22 06:00:00	6396	423
1927	2018-03-22 07:00:00	6699	459
1928	2018-03-22 08:00:00	6333	526
1929	2018-03-22 09:00:00	5404	578
1930	2018-03-22 10:00:00	4218	599
1931	2018-03-22 11:00:00	3083	594
1932	2018-03-22 12:00:00	2182	575
1933	2018-03-22 13:00:00	1608	557
1934	2018-03-22 14:00:00	1729	534
1935	2018-03-22 15:00:00	2614	512
1936	2018-03-22 16:00:00	3872	495
1937	2018-03-22 17:00:00	5153	467
1938	2018-03-22 18:00:00	6105	467
1939	2018-03-22 19:00:00	6560	506
1940	2018-03-22 20:00:00	6433	565
1941	2018-03-22 21:00:00	5700	615
1942	2018-03-22 22:00:00	4653	638
1943	2018-03-22 23:00:00	3604	666
1944	2018-03-23	2750	652
1945	2018-03-23 01:00:00	2095	616
1946	2018-03-23 02:00:00	1883	588
1947	2018-03-23 03:00:00	2421	571
1948	2018-03-23 04:00:00	3456	529
1949	2018-03-23 05:00:00	4638	513
1950	2018-03-23 06:00:00	5697	500
1951	2018-03-23 07:00:00	6347	509
1952	2018-03-23 08:00:00	6503	539
1953	2018-03-23 09:00:00	6039	585
1954	2018-03-23 10:00:00	5136	637
1955	2018-03-23 11:00:00	4138	650
1956	2018-03-23 12:00:00	3234	647
1957	2018-03-23 13:00:00	2531	632
1958	2018-03-23 14:00:00	2210	602
1959	2018-03-23 15:00:00	2527	575
1960	2018-03-23 16:00:00	3385	535
1961	2018-03-23 17:00:00	4483	525
1962	2018-03-23 18:00:00	5502	525
1963	2018-03-23 19:00:00	6220	540
1964	2018-03-23 20:00:00	6487	579
1965	2018-03-23 21:00:00	6235	638
1966	2018-03-23 22:00:00	5570	673
1967	2018-03-23 23:00:00	4700	694
1968	2018-03-24	3832	695
1969	2018-03-24 01:00:00	3108	689
1970	2018-03-24 02:00:00	2596	682
1971	2018-03-24 03:00:00	2506	667
1972	2018-03-24 04:00:00	2997	652
1973	2018-03-24 05:00:00	3902	642
1974	2018-03-24 06:00:00	4867	625
1975	2018-03-24 07:00:00	5615	611
1976	2018-03-24 08:00:00	6102	631
1977	2018-03-24 09:00:00	6172	660
1978	2018-03-24 10:00:00	5704	680
1979	2018-03-24 11:00:00	4954	699
1980	2018-03-24 12:00:00	4197	716
1981	2018-03-24 13:00:00	3491	716
1982	2018-03-24 14:00:00	2854	715
1983	2018-03-24 15:00:00	2552	702
1984	2018-03-24 16:00:00	2830	694
1985	2018-03-24 17:00:00	3543	686
1986	2018-03-24 18:00:00	4440	661
1987	2018-03-24 19:00:00	5225	658
1988	2018-03-24 20:00:00	5753	664
1989	2018-03-24 21:00:00	6003	685
1990	2018-03-24 22:00:00	5821	707
1991	2018-03-24 23:00:00	5224	743
1992	2018-03-25	4516	763
1993	2018-03-25 01:00:00	3883	768
1994	2018-03-25 01:00:00	3282	756
1995	2018-03-25 03:00:00	2763	753
1996	2018-03-25 04:00:00	2655	749
1997	2018-03-25 05:00:00	3038	722
1998	2018-03-25 06:00:00	3707	704
[truncated: 38,887 more rows]
